# Supplementary material
Source: ML conference proceedings conference paper supplement (https://openreview.net/forum?id=GbXn0Dgf7f)
Supplement: supplementary_material [file attachment]

# SUPPLEMENT: DOES DEEP ACTIVE LEARNING WORK IN THE WILD?

**Anonymous authors**

Paper under double-blind review

## 1 DETAILS OF THE BENCHMARKING METHODS

**Core-set (GSx: Greedy sampling in  $x$  space)** Sener & Savarese (2017). This approach only relies upon the diversity of points in the input space,  $\mathcal{X}$ , when selecting new query locations. A greedy selection criterion is used, given by

$$q_{GSx}(x^*) = \min_{x \in \mathcal{L} \cup \mathcal{Q}} \text{dist}(x^*, x)$$

where  $\mathcal{L}$  is the labeled set,  $\mathcal{Q}$  is the already selected query points and  $\text{dist}$  being L2 distance.

**Greedy sampling in  $y$  space (GSy)** Wu et al. (2019). Similar to GSx which maximizes diversity in the  $x$  space in a greedy fashion, GSy maximizes the diversity in the  $y$  space in a greedy fashion:

$$q_{GSy}(x^*) = \min_{y \in \mathcal{L} \cup \mathcal{Q}} \text{dist}(f(x^*), y)$$

where  $f(x)$  is the current model prediction of the  $x$  and  $y$  is the labels in the already labeled training set plus the predicted labels for the points (to be labeled) selected in the current step.

**Greedy sampling in  $xy$  space (GSxy)** Wu et al. (2019). Named as 'Improved greedy sampling (iGS)' in the original paper Wu et al. (2019), this approach combines GSx and GSy and uses multiplication of the distance of both  $x$  and  $y$  space in its acquisition function:

$$q_{GSxy}(x^*) = \min_{(x,y) \in \mathcal{L} \cup \mathcal{Q}} \text{dist}(x^*, x) * \text{dist}(f(x^*), y)$$

**Query-by-committee (QBC)** Seung et al. (1992) The QBC approach is pure uncertainty sampling if we set  $q(x) = q_{QBC}(x)$ :

$$q_{QBC}(x) = \frac{1}{N} \sum_{n=1}^N (\hat{f}_n(x) - \mu(x))^2$$

Here  $\hat{f}_n$  denotes the  $n^{\text{th}}$  model in an ensemble of  $N_{ens}$  models (DNNs in our case), and  $\mu(x)$  is the mean of the ensemble predictions at  $x$ . In each iteration of AL these models are trained on all available training data at that iteration.

**QBC with diversity (Div-QBC)** Kee et al. (2018). This method improves upon QBC by adding a term to  $q$  that also encourages the selected query points to be diverse from one another. This method introduces a hyperparameter for the relative weight of the diversity and QBC criteria and we use an equal weighting ( $\alpha = 0.5$  Kee et al. (2018)).

$$\begin{aligned} q_{QBCDiv}(x) &= (1 - \alpha) * q_{QBC}(x) + \alpha * q_{div}(x) \\ q_{div}(x^*) &= q_{GSx}(x^*) \end{aligned}$$

**QBC with diversity and density (DenDiv-QBC)** Kee et al. (2018). This method builds upon Div-QBC by adding a term to  $q(x)$  that encourages query points to have uniform density. This method introduces two new hyperparameters for the relative weight ( $\alpha = \beta = \frac{1}{3}$ ) of the density, diversity, and QBC criteria, and we use an equal weighting as done in the original paper Kee et al. (2018).

$$\begin{aligned} q_{QBCDivDen}(x) &= (1 - \alpha - \beta) * q_{QBC}(x) \\ &\quad + \alpha * q_{div}(x) + \beta * q_{den}(x) \\ q_{den}(x^*) &= \frac{1}{k} \sum_{x \in N_k(x^*)} \text{sim}(x^*, x) \end{aligned}$$

where  $N_k(x^*)$  is the  $k$  nearest neighbors of an unlabeled point,  $sim(x^*, x)$  is the cosine similarity between points.

**Bayesian active learning by disagreement (BALD)** Tsymbalov et al. (2018). BALD uses the Monte Carlo dropout technique to produce multiple probabilistic model output to estimate the uncertainty of model output and uses that as the criteria of selection (same as  $q_{QBC}(x)$ ). We used 25 forward passes to estimate the disagreement.

**Expected model output change (EMOC)** Käding et al. (2018); Ranganathan et al. (2020). EMOC is a well-studied AL method for the classification task that strives to maximize the change in the model (output) by labeling points that have the largest gradient. However, as the true label is unknown, some label distribution assumptions must be made. Simple approximations like uniform probability across all labels exist can be made for classification but not for regression tasks. Ranganathan et al. (2020) made an assumption that the label is simply the average of all predicted output in the unlabeled set ( $y'(x') = \mathbb{E}_{x \in \mathcal{U}} f(x)$ ) and we use this implementation for our benchmark of EMOC.

$$q_{EMOC}(x') = \mathbb{E}_{y'|x'} \mathbb{E}_x \|f(x; \phi') - f(x; \phi)\|_1 \\ \approx \mathbb{E}_x \|\nabla_{\phi} f(x; \phi) * \nabla_{\phi} \mathcal{L}(\phi; (x', y'))\|_1$$

where  $f(x; \phi)$  is the current model output for point  $x$  with model parameter  $\phi$ ,  $\phi'$  is the updated parameter after training on labeled point  $x'$  with label  $y'$  and  $\mathcal{L}(\phi; (x', y'))$  is the loss of the model with current model parameter  $\phi$  on new labeled data  $(x', y')$ .

**Learning Loss** Yoo & Kweon (2019). Learning Loss is another uncertainty-based AL method that instead of using proxies calculated (like variance), learns the uncertainty directly by adding an auxiliary model to predict the loss of the current point that the regression model would make. The training of the auxiliary model concurs with the main regressor training and it uses a soft, pair-wise ranking loss instead of Mean Squared Error (MSE) loss to account for the fluctuations of the actual loss during the training.

$$q_{LL}(x) = f_{loss}(x)$$

where  $f_{loss}(x)$  is the output of the loss prediction auxiliary model. In this AL method, there are multiple hyper-parameters (co-training epoch, total auxiliary model size, auxiliary model connections, etc.) added to the AL process, all of which we used the same values in the paper if specified Yoo & Kweon (2019).

**Density Aware Core-set (DACS)** Kim & Shin (2022) A diversity-based AL method that not only considers core-set metric but also considers the density and strives to sample low-density regions. The original DACS also encodes the image space into feature space and uses locality-sensitive hashing techniques to accelerate the nearest neighbor calculation and prevent computational bottlenecks. As our scientific computing tasks does not involve high dimensional image as well as having much lower dataset size in general, instead of encoded feature space distance, we used input space distance and locality-sensitive hashing was dropped as we don't face such computational bottleneck for the nearest neighbor calculation with our smaller pool compared to theirs.

**Cluster Margin adapted to regression problem: Cluster Variance (ClusterVar)** Citovsky et al. (2021) To alleviate the robustness issue arising in larger batch AL scenarios, Cluster-Margin Citovsky et al. (2021) method is proposed to add necessary diversity to the uncertainty sampling. The original method used margin as its uncertainty metric as it was demonstrated on image classification tasks, and we adapted it into a variance metric in a regression setting. During Cluster Margin, Hierarchical Agglomerative Clustering (HAC) is run once on the unlabeled pool before the AL process and during each round a round-robin selection is carried out from the smallest cluster to the largest cluster, each time selecting the unlabeled sample with the highest uncertainty metric.

## 2 DETAILS OF BENCHMARK DATASETS USED

**1D sine wave (Wave).** A noiseless 1-dimensional sinusoid with varying frequency over  $x$ , illustrated in Fig. 1.

$$y = x * \sin(a_1 * \sin(a_2 * x)),$$

where  $a_1 = 3$  and  $a_2 = 30$  is chosen to make a relative complicated loss surface for the neural network to learn while also having a difference in sensitivity in the domain of  $x$ .

108 **2D robotic arm (Arm) Ren et al. (2020)** In this problem we aim to predict the 2D spatial location of  
 109 the endpoint of a robotic arm based on its joint angles. Illustrated in Fig. 1. The Oracle function is  
 110 given by

$$111 \quad y_0 = \sum_{i=1}^3 \cos\left(\frac{\pi i}{2} x_i\right) * l_i, y_1 = x_0 + \sum_{i=1}^3 \sin\left(\frac{\pi i}{2} x_i\right) * l_i$$

112 where  $y$  is the position in the 2D plane,  $x_0$  is the adjustable starting horizontal position,  $x_{i=1,2,3}$  are  
 113 the angles of the arm relative to horizontal reference and  $l_{i=0,1,2} = [0.5, 0.5, 1]$  represents the  $i$ -th  
 114 length of the robotic arm component. The dataset is available under the MIT license.

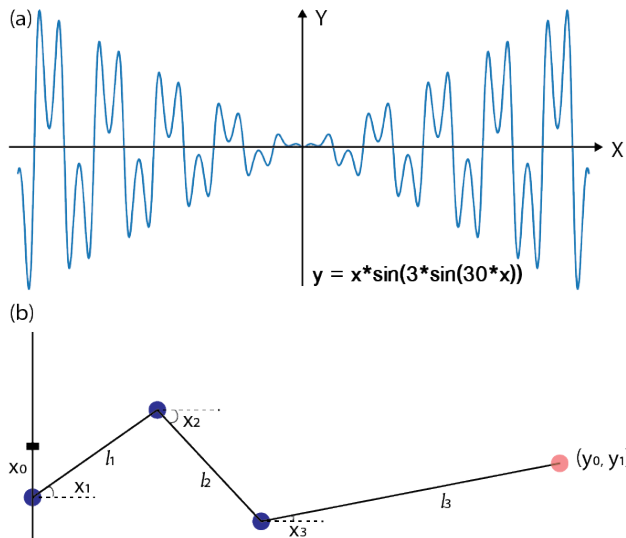

117  
118  
119  
120  
121  
122  
123  
124  
125  
126  
127  
128  
129  
130  
131  
132  
133  
134  
135  
136  
137  
138  
Figure 1: Schematic illustration of sine wave and robotic arm datasets

139 **Stacked material (Stack) Chen et al. (2019).** In this problem, we aim to predict the reflection  
 140 spectrum of a material, sampled at 201 wavelength points, based upon the thickness of each of the 5  
 141 layers of the material, illustrated in Fig. 2. It was also benchmarked in Ren et al. (2022). An analytic  
 142 Oracle function is available based upon physicsChen et al. (2019).

143 **Artificial Dielectric Material (ADM) Deng et al. (2021b)** This problem takes the geometric structure  
 144 of a material as input, and the reflection spectrum of the material, as a function of frequency, illustrated  
 145 in Fig. 2. It was also benchmarked in Deng et al. (2021a). This dataset -released under CC BY 4.0  
 146 License - consists of input space of 3D geometric shape parameterized into 14 dimension space and  
 147 the output is the spectral response of the material. The oracle function is a DNN Deng et al. (2021a).

148 **NASA Airfoil (Foil) Dua & Graff (2017)** NASA dataset published on <https://archive.ics.uci.edu/dataset/291/airfoil+self+noise> UCI ML repository under CC BY  
 149 4.0 License Dua & Graff (2017) obtained from a series of aerodynamic and acoustic tests of 2D/3D  
 150 airfoil blade sections conducted in an anechoic wind tunnel, illustrated in Fig. 3. The input is the  
 151 physical properties of the airfoil, like the angle of attack and chord length and the regression target is  
 152 the sound pressure in decibels. We use a well-fitted random forest fit to the original dataset as our  
 153 oracle function following prior workTrabuco et al. (2022). The fitted random forest architecture and  
 154 its weights are also shared in our code repo to ensure future work makes full use of such benchmark  
 155 datasets as we did.

156  
157 **Hydrodynamics (Hydro) Dua & Graff (2017)** Experiment conducted by the Technical University  
 158 of Delft, illustrated in Fig. 3, (hosted on <https://archive.ics.uci.edu/ml/datasets/Yacht+Hydrodynamics> UCI ML repository under CC BY 4.0 License Dua & Graff (2017)), this  
 159 dataset contains basic hull dimensions and boat velocity and their corresponding residuary resistance.  
 160 Input is 6 dimensions and output is the 1 dimension. We use a well-fitted random forest fit to the  
 161 original dataset as our oracle function. The fitted random forest architecture and its weights are also

162  
163  
164  
165  
166  
167  
168  
169  
170  
171  
172  
173  
174  
175  
176  
177

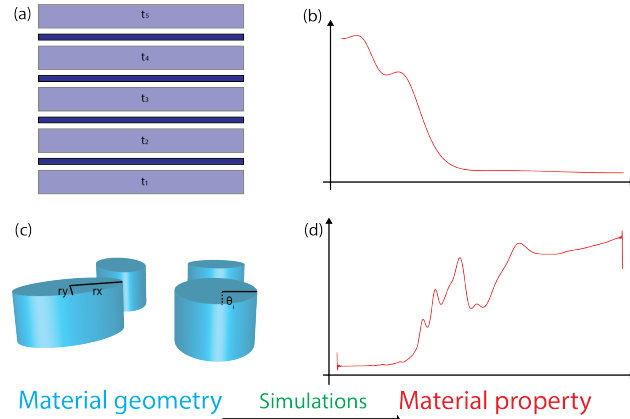

178 Figure 2: (a, c) are schematic illustration of two material design datasets (Stack & ADM). (b, d) are  
179 example spectra of their material property after simulations from their geometric parameterization  
180 (typically from Maxwell equation solvers that are slow and hence can benefit from active learning)

181  
182

shared in our code repository to ensure future work makes full use of such benchmark dataset as we  
183 did.

184  
185  
186  
187  
188  
189  
190  
191  
192  
193  
194  
195  
196  
197  
198  
199  
200  
201

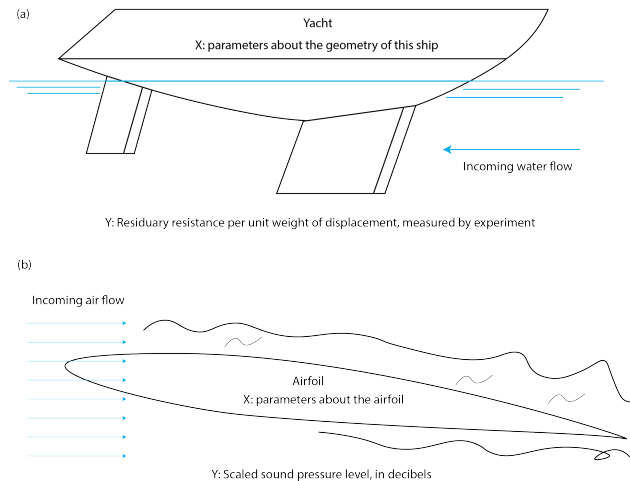

202 Figure 3: Schematic illustration of Airfoil and Hydro experiments. Reproduced from the original  
203 source of experiment reports from NASA and Delft University of technology. (a) The Hydro  
204 experiment with an actual yacht being built and resistance was measured in a water flow experiment  
205 as the regression target  $y$ . (b) Airfoil experiment where input is the parameters of the airfoil and the  
206 sound pressure level is measured as target  $y$  of the regression task.

207

**Bessel equation** The solution to the below single dimension second-order differential equation:

208  
209  
210  
211

$$x^2 \frac{d^2 y}{dx^2} + x \frac{dy}{dx} + (x^2 - \alpha^2)y = 0$$

212  
213  
214  
215

where input is  $\alpha$  and  $x$  position given.  $\alpha$  is limited to non-negative integers smaller than 10 and  
213  $x \in [0, 10]$ . The solution examples can be visualized in Fig. 4. Our choice of  $\alpha$  values makes the  
214 Bessel functions cylinder harmonics and they frequently appear in solutions to Laplace's equation  
215 (in cylindrical systems). The implementation we used is the python package 'scipy.special.jv(v,z)'  
Virtanen et al. (2020).

216 **Damping oscillator equation** The solution to the below ordinary second-order differential equation:

$$217 \quad m \frac{dx^2}{dt^2} + b \frac{dx}{dt} + \frac{mg}{l} x = 0$$

218 where  $m$  is the mass of the oscillator,  $b$  is the air drag,  $g$  is the gravity coefficient,  $l$  is the length of the  
219 oscillator's string and it has analytical solution of form

$$220 \quad x = ae^{-bt} \cos(\alpha - \psi)$$

221 where  $a$  is the amplitude,  $b$  is the damping coefficient,  $\alpha$  is the frequency and  $\psi$  is the phase shift.  
222 We assume  $\psi$  to be 0 and let  $a, b, \alpha$  be the input parameters. The output, unlike our previous ODE  
223 dataset, is taken as the first 100 time step trajectory of the oscillator, making it a high dimensional  
224 manifold (nominal dimension of 100 with true dimension of 3). The trajectory is illustrated in Fig. 4.  
225 We implement the above solution by basic python math operations.  
226  
227  
228  
229

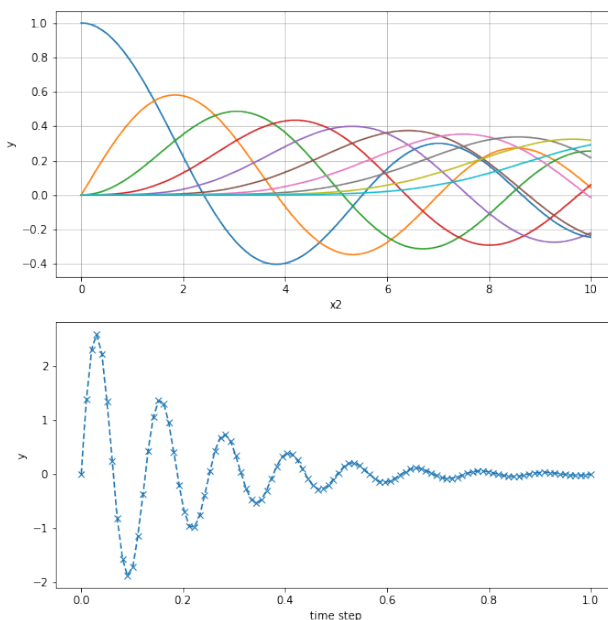

230  
231  
232  
233  
234  
235  
236  
237  
238  
239  
240  
241  
242  
243  
244  
245  
246  
247  
248  
249  
250  
251  
252  
253  
254  
255  
256  
257  
258  
259  
260  
261  
262  
263  
264  
265  
266  
267  
268  
269

Figure 4: Schematic illustration of Bessel function solution and the damping oscillator solutions.

### 3 LIST OF POOL RATIO USED IN EXISTING LITERATURE

17000 McCallumzy & Nigamy (1998), 20 to 2000 Kee et al. (2018), 300 to 375Santos et al. (2020),  
11-20 Roy et al. (2018), 1000 Burbidge et al. (2007), and 1 to 11 Tan et al. (2019).

### 4 DETAILS OF MODELS TRAINING AND ARCHITECTURE

In the below Table 1, we present the model architecture for each of our benchmarked datasets. Unless  
otherwise noted, all of them are fully connected neural networks.

Table 1: Regression model,  $\hat{f}$  architecture details for each problem. \*: for ADM, there are 3 layers of  
convolutions after the linear layer)

| FEAT  | SINE | ROBO | STACK | ADM  | FOIL | HYDR | BESS | DAMP |
|-------|------|------|-------|------|------|------|------|------|
| NODE  | 20   | 500  | 700   | 1500 | 200  | 50   | 50   | 500  |
| LAYER | 9    | 4    | 9     | 4*   | 4    | 6    | 6    | 6    |

We implemented our models in PyTorch Paszke et al. (2019). Beyond the above architectural differences, the rest of the model training settings are the same across the models: Starting labeled set of size 80, in each step DAL finds 40 points to be labeled for 50 active learning steps. Each regression model is an ensemble network of 10 models of size illustrated in Table 1 except the ADM dataset (5 instead of 10 due to RAM issue). The test dataset is kept at 4000 points uniformly sampled across the  $x$ -space and they are fixed the same across all experiments for the same dataset. No bootstrapping is used to train the ensemble network and the only source of difference between networks in the ensemble (committee) is the random initialization of weights.

The batch size is set to be 5000 (larger than the largest training set) so that the incomplete last batch would not affect the training result (as we sample more and more data, we can't throw away the last incomplete batch but having largely incomplete batch de-stabilizes training and introduce noise into the experiment. Adam optimizer is used with 500 training epochs and the model always retrains from scratch. (We observe that the training loss is much higher if we inherit from the last training episode and do not start from scratch, which is consistent with other literature Beck et al. (2021)). The learning rate is generally  $1e-3$  (some datasets might differ), and the decay rate of 0.8 with the decay at the plateau training schedule. The regularization weight is usually  $1e-4$  (dataset-dependent as well). The hyper-parameters only change with respect to the dataset but never with respect to DAL used.

The hyperparameters are tuned in the same way as the model architecture: Assume we have a relatively large dataset (2000 randomly sampling points) and tune our hyperparameter on this set. This raises another robustness problem of deep active learning, which is how to determine the model architecture before we have enough labels. This is currently out of the scope of this work as we focused on how different DALs behave with the assumption that the model architectures are chosen smartly and would be happy to investigate this issue in future work.

For the BALD method, we used a dropout rate of 0.5 as advised by previous work. As BALD requires a different architecture than other base methods (a dropout structure, that is capable of getting a good estimate even with 50% of the neurons being dropped), the model architecture for the active learning is different in that it enlarges each layer by a constant factor that can make it the relatively same amount of total neurons like other DAL methods. Initially, the final trained version of the dropout model is used as the regression model to be evaluated. However, we found that an oversized dropout model hardly fits as well as our ensembled counterpart like other DAL methods. Therefore, to ensure the fairness of comparison, we trained another separate, ensembled regression model same as the other DALs and reported our performance on that.

For the LearningLoss method, we used the same hyper-parameter that we found in the cited work in the main text: relative weight of learning loss of 0.001 and a training schedule of 60% of joint model training and the rest epoch we cut the gradient flow to the main model from the auxiliary model. For the design of the auxiliary model, we employed a concatenation of the output of the last three hidden layers of our network, each followed by a fully connected network of 10 neurons, before being directed to the final fully connected layer of the auxiliary network that produces a single loss estimate.

For the EMOC method, due to RAM limit and time constraint, we can not consider all the model parameters during the gradient calculation step (For time constraint, Table 2 gives a good reference of how much longer EMOC cost, even in this reduced form). Therefore, we implemented two approximations: (i) For the training set points where the current model gradients are evaluated, instead of taking the ever-growing set that is more and more biased towards the DAL selection, we fixed it to be the 80 original, uniformly sampled points. (ii) We limit the number of model parameters to evaluate the EMOC criteria to 50k. We believe taking the effect of 50 thousand parameters gives a good representation of the model's response (output change) for new points. We acknowledge that these approximations might be posing constraints to EMOC, however, these are practical, solid challenges for DAL practitioners as well and these are likely the compromise to be made during application.

#### 4.1 COMPUTATIONAL RESOURCES

Here we report the computational resources we used for this work: AMD CPU with 64 cores; NVIDIA 3090 GPU x4 (for each of the experiment we used a single GPU to train); 256GB RAM.

## 5 ADDITIONAL PERFORMANCE PLOTS

As the benchmark conducts a huge set of experiments that are hard to fit in the main text, here we present all the resulting figures for those who are interested to dig more takeaways.

### 5.1 TIME PERFORMANCE OF THE BENCHMARKED DAL METHODS

We also list the time performance of each DAL method, using the ROBO dataset as an example in the below Table 2. Note that this is only the sampling time cost, not including the model training time, which is usually significantly larger than the active learning sampling time at each step. The only DAL method that potentially has a time performance issue is the EMOC method, which requires the calculation of each of the gradients with respect to all parameters and therefore takes a much longer time than other DAL methods. However, as it is shown in the main text that it is not a robust method in our setting, there is no dilemma of performance/time tradeoff presented here.

Table 2: Time performance for average time spent during the sampling process for ROBO dataset per active learning step (40 points) in ms for pool ratio of 2. LL: LearningLoss

| DATASET | RANDOM | GSX  | GSXY   | GSY       | BALD  | EMOC         |
|---------|--------|------|--------|-----------|-------|--------------|
| TIME    | 2.15   | 4.96 | 10.27  | 6.85      | 9.06  | <b>756.6</b> |
| DATASET | LL     | QBC  | QBCDIV | QBCDIVDEN | DACS  | CLUSTERVAR   |
| TIME    | 6.53   | 4.29 | 9.04   | 10.38     | 21.70 | 4.31         |

### 5.2 COMBINED PLOT WITH $nAUC_{MSE}$ AND $nDIV$

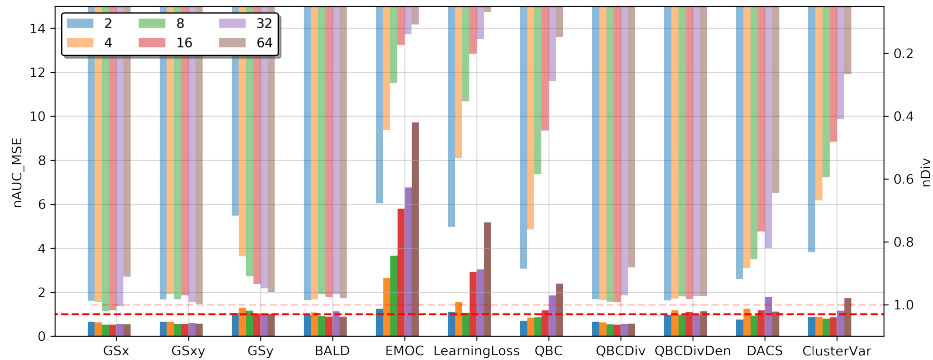

Figure 5:  $nAUC_{MSE}$  and  $nDiv$  plot for SINE

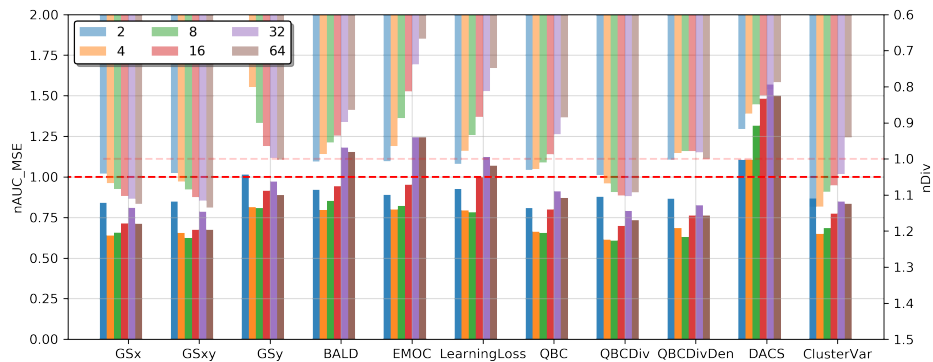

Figure 6:  $nAUC_{MSE}$  and  $nDiv$  plot for STACK

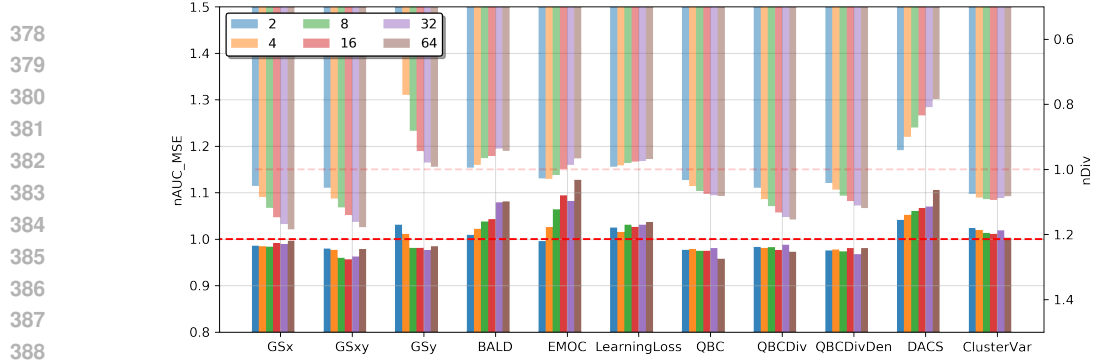

Figure 7:  $nAUC_{MSE}$  and  $nDiv$  plot for ADM

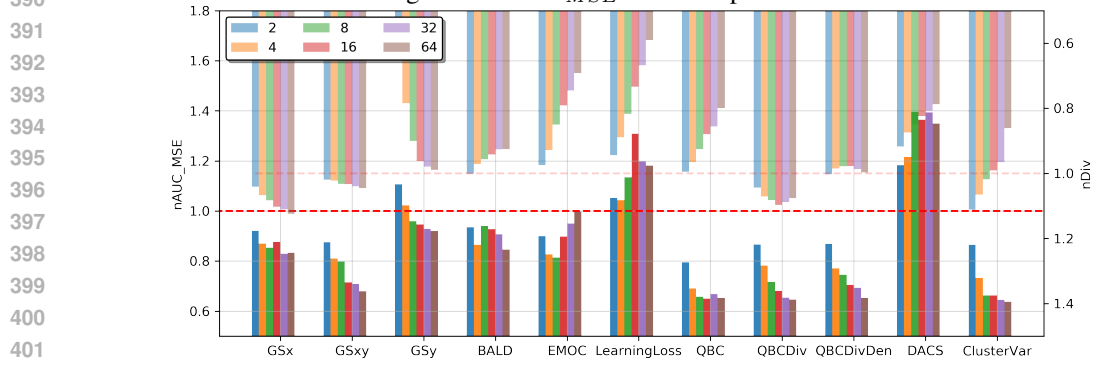

Figure 8:  $nAUC_{MSE}$  and  $nDiv$  plot for FOIL

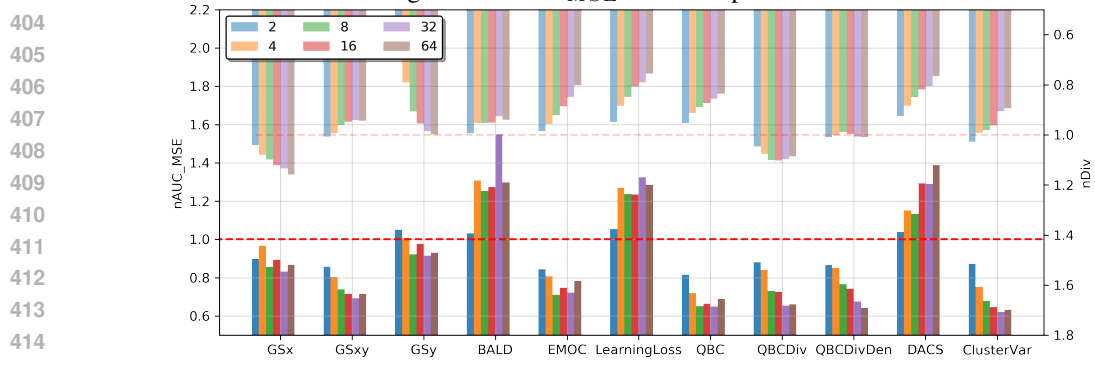

Figure 9:  $nAUC_{MSE}$  and  $nDiv$  plot for HYDR

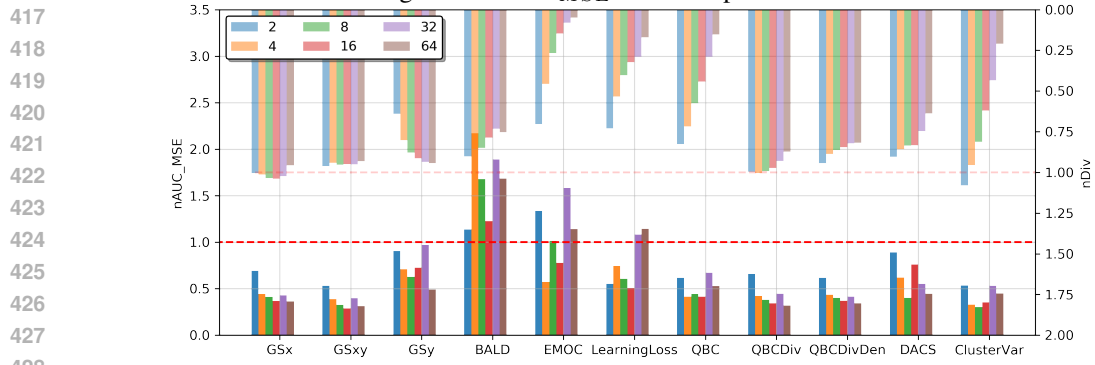

Figure 10:  $nAUC_{MSE}$  and  $nDiv$  plot for BESS

429  
430  
431



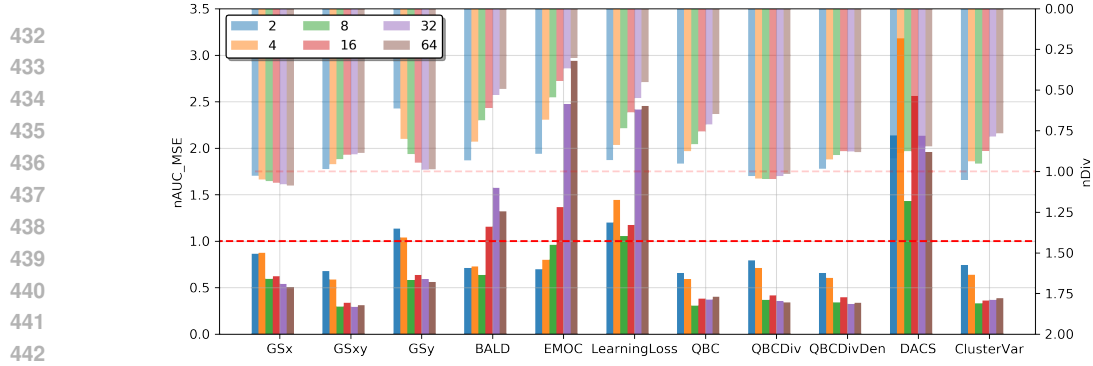

Figure 11:  $nAUC_{MSE}$  and  $nDiv$  plot for DAMP

### 5.3 MSE VS ACTIVE LEARNING STEP PLOT

We also present the traditional plot of the MSE vs active learning step for reference. For each of the plots below, the MSE are smoothed with a smoothing parameter of 0.5 using the tensorboard smoothing visualizing function Abadi et al. (2015). The  $x$  labels are from 0 - 49, where 0 measures the end of the first active learning step.

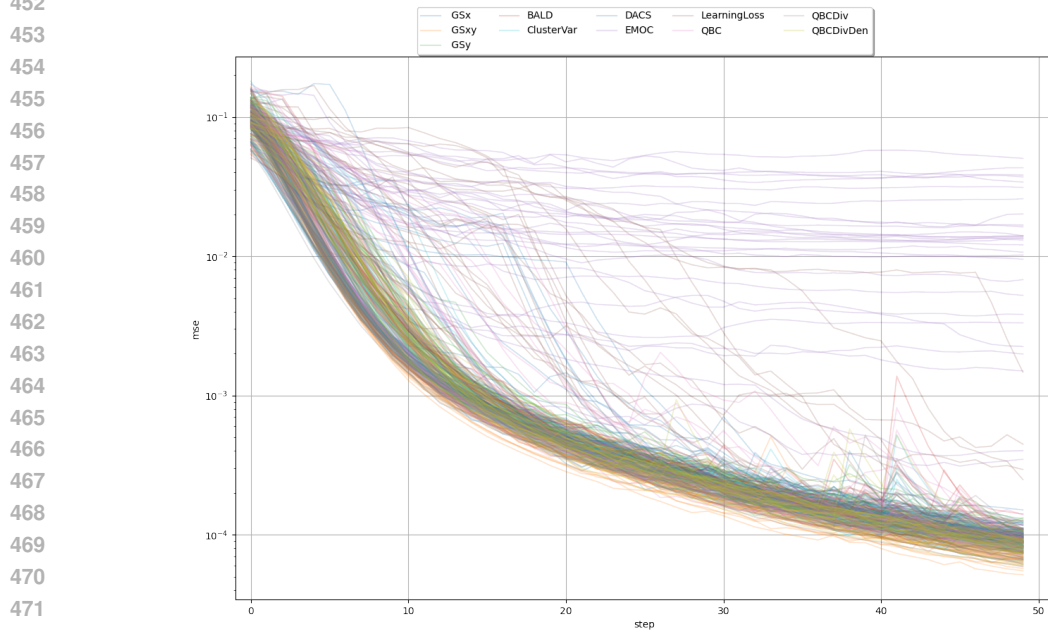

Figure 12: MSE plot for SINE

486  
487  
488  
489  
490  
491  
492  
493  
494  
495  
496  
497  
498  
499  
500  
501  
502  
503  
504  
505  
506  
507  
508  
509  
510  
511  
512  
513  
514  
515  
516  
517  
518  
519  
520  
521  
522  
523  
524  
525  
526  
527  
528  
529  
530  
531  
532  
533  
534  
535  
536  
537  
538  
539

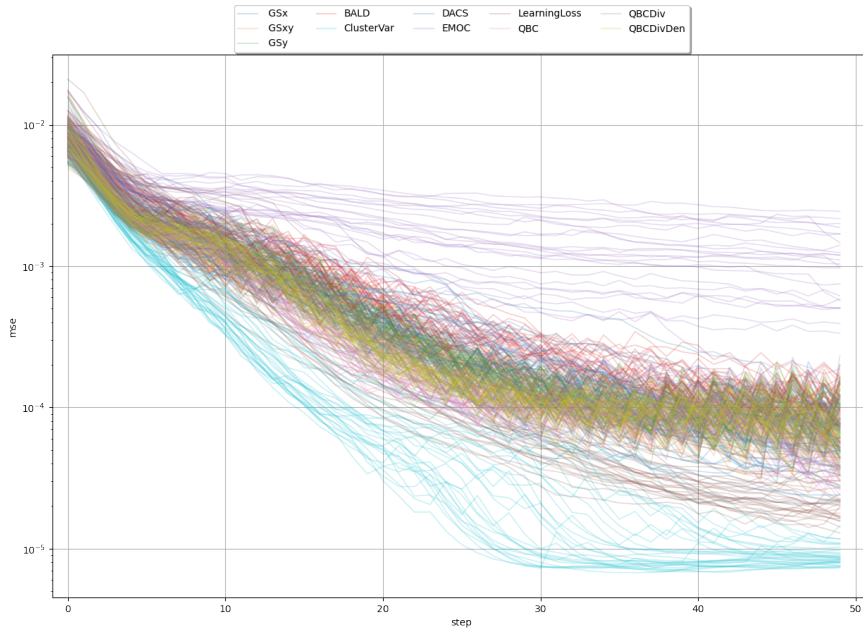

Figure 13: MSE plot for ROBO

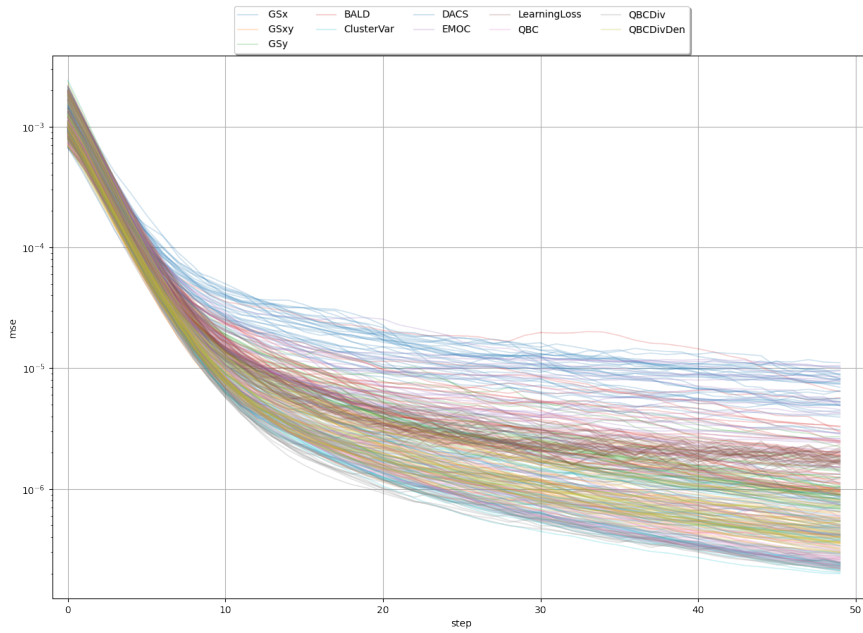

Figure 14: MSE plot for STACK

540  
541  
542  
543  
544  
545  
546  
547  
548  
549  
550  
551  
552  
553  
554  
555  
556  
557  
558  
559  
560  
561  
562  
563  
564  
565  
566  
567  
568  
569  
570  
571  
572  
573  
574  
575  
576  
577  
578  
579  
580  
581  
582  
583  
584  
585  
586  
587  
588  
589  
590  
591  
592  
593

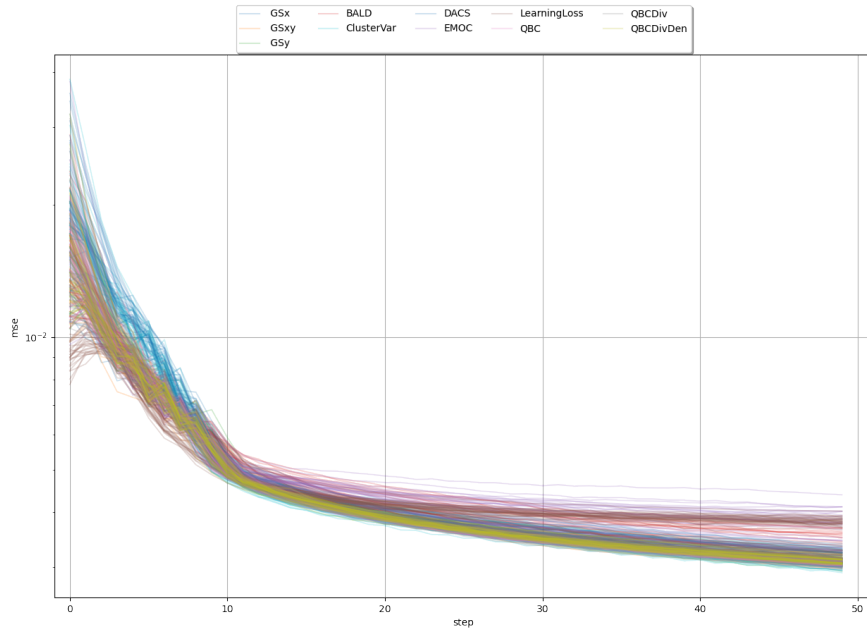

Figure 15: MSE plot for ADM

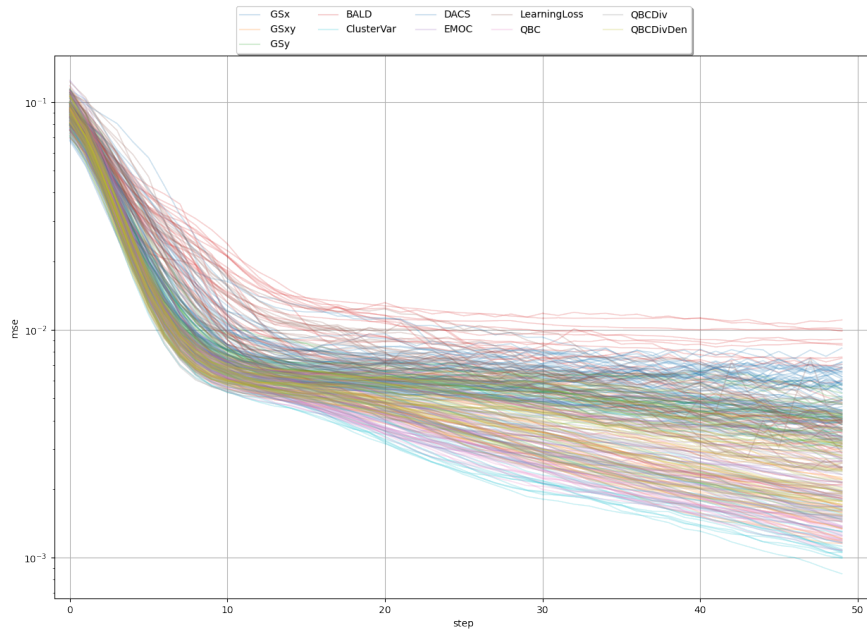

Figure 16: MSE plot for HYDR

594  
595  
596  
597  
598  
599  
600  
601  
602  
603  
604  
605  
606  
607  
608  
609  
610  
611  
612  
613  
614  
615  
616  
617  
618  
619  
620  
621  
622  
623  
624  
625  
626  
627  
628  
629  
630  
631  
632  
633  
634  
635  
636  
637  
638  
639  
640  
641  
642  
643  
644  
645  
646  
647

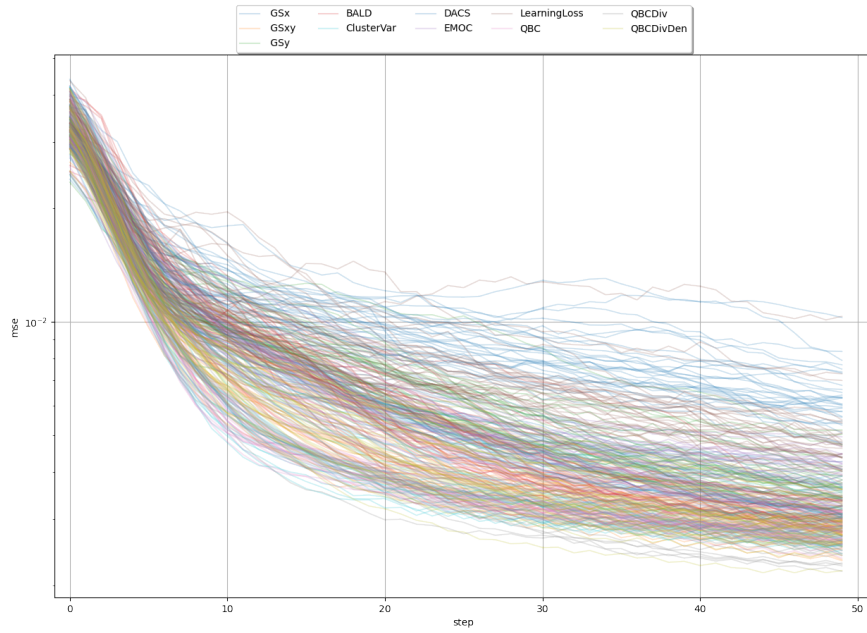

Figure 17: MSE plot for FOIL

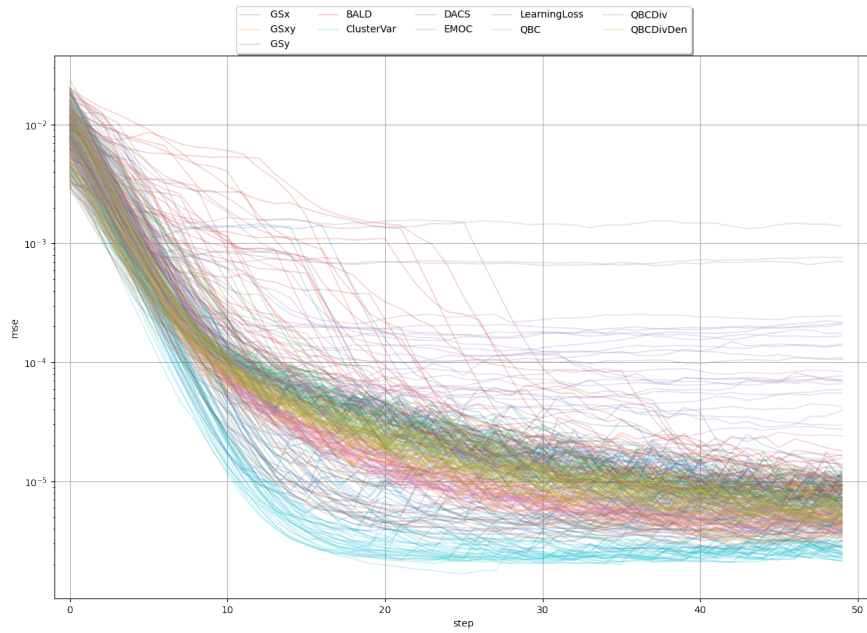

Figure 18: MSE plot for BESS

648  
649  
650  
651  
652  
653  
654  
655  
656  
657  
658  
659  
660  
661  
662  
663  
664  
665  
666  
667  
668  
669  
670  
671  
672  
673  
674  
675  
676  
677  
678  
679  
680  
681  
682  
683  
684  
685  
686  
687  
688  
689  
690  
691  
692  
693  
694  
695  
696  
697  
698  
699  
700  
701

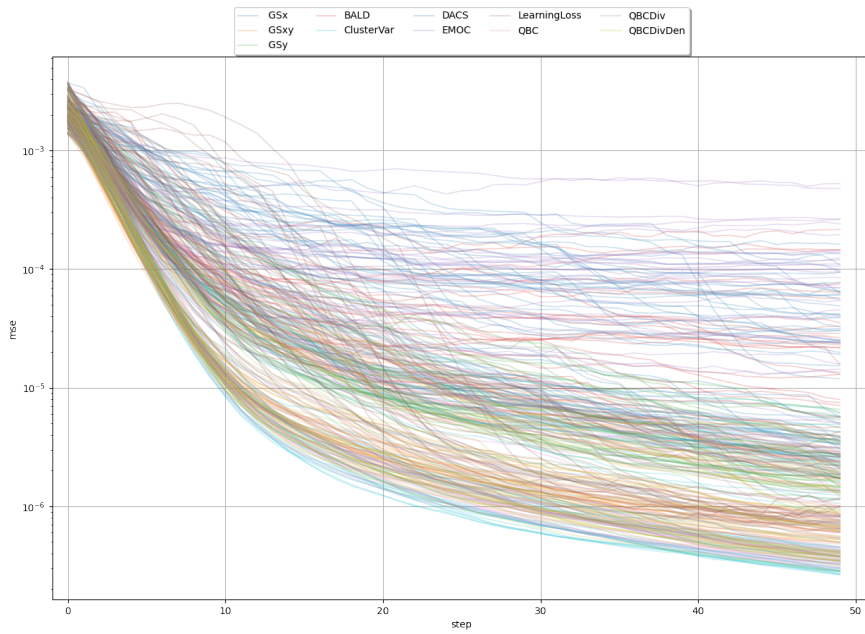

Figure 19: MSE plot for DAMP

## 702 REFERENCES

- 703
- 704 Martín Abadi, Ashish Agarwal, Paul Barham, Eugene Brevdo, Zhifeng Chen, Craig Citro, Greg S.  
705 Corrado, Andy Davis, Jeffrey Dean, Matthieu Devin, Sanjay Ghemawat, Ian Goodfellow, Andrew  
706 Harp, Geoffrey Irving, Michael Isard, Yangqing Jia, Rafal Jozefowicz, Lukasz Kaiser, Manjunath  
707 Kudlur, Josh Levenberg, Dandelion Mané, Rajat Monga, Sherry Moore, Derek Murray, Chris Olah,  
708 Mike Schuster, Jonathon Shlens, Benoit Steiner, Ilya Sutskever, Kunal Talwar, Paul Tucker, Vincent  
709 Vanhoucke, Vijay Vasudevan, Fernanda Viégas, Oriol Vinyals, Pete Warden, Martin Wattenberg,  
710 Martin Wicke, Yuan Yu, and Xiaoqiang Zheng. TensorFlow: Large-scale machine learning on  
711 heterogeneous systems, 2015. URL <https://www.tensorflow.org/>. Software available  
712 from tensorflow.org.
- 713 Nathan Beck, Durga Sivasubramanian, Apurva Dani, Ganesh Ramakrishnan, and Rishabh Iyer.  
714 Effective evaluation of deep active learning on image classification tasks. *arXiv preprint*  
715 *arXiv:2106.15324*, 2021.
- 716 Robert Burbidge, Jem J Rowland, and Ross D King. Active learning for regression based on query by  
717 committee. In *International conference on intelligent data engineering and automated learning*,  
718 pp. 209–218. Springer, 2007.
- 719 Yingshi Chen, Jinfeng Zhu, Yinong Xie, Naixing Feng, and Qing Huo Liu. Smart inverse design  
720 of graphene-based photonic metamaterials by an adaptive artificial neural network. *Nanoscale*,  
721 11(19):9749–9755, 2019. doi: 10.1039/c9nr01315f. URL [https://doi.org/10.1039/  
722 c9nr01315f](https://doi.org/10.1039/c9nr01315f).
- 723
- 724 Gui Citovsky, Giulia DeSalvo, Claudio Gentile, Lazaros Karydas, Anand Rajagopalan, Afshin  
725 Rostamizadeh, and Sanjiv Kumar. Batch active learning at scale. *Advances in Neural Information*  
726 *Processing Systems*, 34:11933–11944, 2021.
- 727 Yang Deng, Juncheng Dong, Simiao Ren, Omar Khatib, Mohammadreza Soltani, Vahid Tarokh,  
728 Willie Padilla, and Jordan Malof. Benchmarking data-driven surrogate simulators for artificial  
729 electromagnetic materials. In *Thirty-fifth Conference on Neural Information Processing Systems*  
730 *Datasets and Benchmarks Track (Round 2)*, 2021a.
- 731 Yang Deng, Simiao Ren, Kebin Fan, Jordan M Malof, and Willie J Padilla. Neural-adjoint method  
732 for the inverse design of all-dielectric metasurfaces. *Optics Express*, 29(5):7526–7534, 2021b.
- 733
- 734 Dheeru Dua and Casey Graff. UCI machine learning repository, 2017. URL [http://archive.  
735 ics.uci.edu/ml](http://archive.ics.uci.edu/ml).
- 736
- 737 Christoph Käding, Erik Rodner, Alexander Freytag, Oliver Mothes, Björn Barz, Joachim Denzler,  
738 and Carl Zeiss AG. Active learning for regression tasks with expected model output changes. In  
739 *BMVC*, pp. 103, 2018.
- 740 Seho Kee, Enrique Del Castillo, and George Runger. Query-by-committee improvement with diversity  
741 and density in batch active learning. *Information Sciences*, 454:401–418, 2018.
- 742
- 743 Yeachan Kim and Bonggun Shin. In defense of core-set: A density-aware core-set selection for active  
744 learning. In *Proceedings of the 28th ACM SIGKDD Conference on Knowledge Discovery and*  
745 *Data Mining*, pp. 804–812, 2022.
- 746 Andrew Kachites McCallumzy and Kamal Nigamy. Employing em and pool-based active learning for  
747 text classification. In *Proc. International Conference on Machine Learning (ICML)*, pp. 359–367.  
748 Citeseer, 1998.
- 749 Adam Paszke, Sam Gross, Francisco Massa, Adam Lerer, James Bradbury, Gregory Chanan,  
750 Trevor Killeen, Zeming Lin, Natalia Gimelshein, Luca Antiga, Alban Desmaison, Andreas  
751 Kopf, Edward Yang, Zachary DeVito, Martin Raison, Alykhan Tejani, Sasank Chilamkurthy,  
752 Benoit Steiner, Lu Fang, Junjie Bai, and Soumith Chintala. Pytorch: An imperative style, high-  
753 performance deep learning library. In *Advances in Neural Information Processing Systems 32*, pp.  
754 8024–8035. Curran Associates, Inc., 2019. URL [http://papers.neurips.cc/paper/  
755 9015-pytorch-an-imperative-style-high-performance-deep-learning-library.  
pdf](http://papers.neurips.cc/paper/9015-pytorch-an-imperative-style-high-performance-deep-learning-library.pdf).

- 756 Hiranmayi Ranganathan, Hemanth Venkateswara, Shayok Chakraborty, and Sethuraman Pan-  
757 chanathan. Deep active learning for image regression. In *Deep Learning Applications*, pp.  
758 113–135. Springer, 2020.
- 759 Simiao Ren, Willie Padilla, and Jordan Malof. Benchmarking deep inverse models over time, and the  
760 neural-adjoint method. *Advances in Neural Information Processing Systems*, 33:38–48, 2020.
- 761  
762 Simiao Ren, Ashwin Mahendra, Omar Khatib, Yang Deng, Willie J Padilla, and Jordan M Malof.  
763 Inverse deep learning methods and benchmarks for artificial electromagnetic material design.  
764 *Nanoscale*, 14(10):3958–3969, 2022.
- 765  
766 Soumya Roy, Asim Unmesh, and Vinay P Namboodiri. Deep active learning for object detection. In  
767 *BMVC*, volume 362, pp. 91, 2018.
- 768  
769 Javier E Santos, Mohammed Mehana, Hao Wu, Masa Prodanovic, Qinjun Kang, Nicholas Lubbers,  
770 Hari Viswanathan, and Michael J Pyrcz. Modeling nanoconfinement effects using active learning.  
771 *The Journal of Physical Chemistry C*, 124(40):22200–22211, 2020.
- 772  
773 Ozan Sener and Silvio Savarese. Active learning for convolutional neural networks: A core-set  
774 approach. *arXiv preprint arXiv:1708.00489*, 2017.
- 775  
776 H Sebastian Seung, Manfred Opper, and Haim Sompolinsky. Query by committee. In *Proceedings of*  
777 *the fifth annual workshop on Computational learning theory*, pp. 287–294, 1992.
- 778  
779 Yao Tan, Liu Yang, Qinghua Hu, and Zhibin Du. Batch mode active learning for semantic seg-  
780 mentation based on multi-clue sample selection. In *Proceedings of the 28th ACM International*  
781 *Conference on Information and Knowledge Management*, pp. 831–840, 2019.
- 782  
783 Brandon Trabucco, Xinyang Geng, Aviral Kumar, and Sergey Levine. Design-bench: Benchmarks  
784 for data-driven offline model-based optimization. *arXiv preprint arXiv:2202.08450*, 2022.
- 785  
786 Evgenii Tsymbalov, Maxim Panov, and Alexander Shapeev. Dropout-based active learning for  
787 regression. In *International conference on analysis of images, social networks and texts*, pp.  
788 247–258. Springer, 2018.
- 789  
790 Pauli Virtanen, Ralf Gommers, Travis E. Oliphant, Matt Haberland, Tyler Reddy, David Cournapeau,  
791 Evgeni Burovski, Pearu Peterson, Warren Weckesser, Jonathan Bright, Stéfan J. van der Walt,  
792 Matthew Brett, Joshua Wilson, K. Jarrod Millman, Nikolay Mayorov, Andrew R. J. Nelson, Eric  
793 Jones, Robert Kern, Eric Larson, C J Carey, İlhan Polat, Yu Feng, Eric W. Moore, Jake VanderPlas,  
794 Denis Laxalde, Josef Perktold, Robert Cimrman, Ian Henriksen, E. A. Quintero, Charles R. Harris,  
795 Anne M. Archibald, Antônio H. Ribeiro, Fabian Pedregosa, Paul van Mulbregt, and SciPy 1.0  
796 Contributors. SciPy 1.0: Fundamental Algorithms for Scientific Computing in Python. *Nature*  
797 *Methods*, 17:261–272, 2020. doi: 10.1038/s41592-019-0686-2.
- 798  
799 Dongrui Wu, Chin-Teng Lin, and Jian Huang. Active learning for regression using greedy sampling.  
800 *Information Sciences*, 474:90–105, 2019.
- 801  
802  
803  
804  
805  
806  
807  
808  
809
